# Supplementary material for: Reducing suicidal thoughts in the Australian general population through web-based self-help: study protocol for a randomized controlled trial
Source: PubMed Central journal article supplement (PMC4348119; doi:10.1186/s13063-015-0589-1), 2015-02-25
Supplement: 13063_2015_589_MOESM2_ESM.pdf [file 13063_2015_589_MOESM2_ESM.pdf]

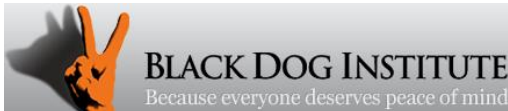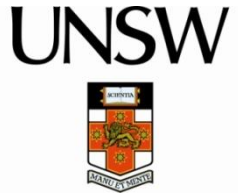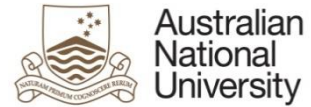

Approval No 13117

## CONSENT FORM

### 'Healthy Thinking' Study

**You are making a decision whether or not to participate. Please note that consenting to participate implies that you understand that:**

- Participation includes making contact with the Suicide Call Back Service.
- You will be sent questionnaires to fill in and possibly reminders to do so.
- You will be randomly assigned to one of two programs.
- Both these programs are unguided and therefore not monitored.
- We want you to be safe during the study and may therefore encourage you to contact the Suicide Call Back Service if needed.
- You will be given the option to provide your phone number, which can then be used by the Suicide Call Back Service to contact you if needed.

**I have read the information provided and have decided to participate in this study.**

- YES
- NO

Submit

(When yes is ticked, people are asked to fill in their e-mail address and first name. They are also given the option to fill in their phone number).
